# Supplementary material for: Isolation and characterization of fetal nucleated red blood cells from maternal blood as a target for single cell sequencing‐based non‐invasive genetic testing
Source: PubMed Central journal article supplement (PMC8254165; doi:10.1002/rmb2.12392), 2021-06-14
Supplement: RMB2-20-352-s001.pdf [file RMB2-20-352-s001.pdf]

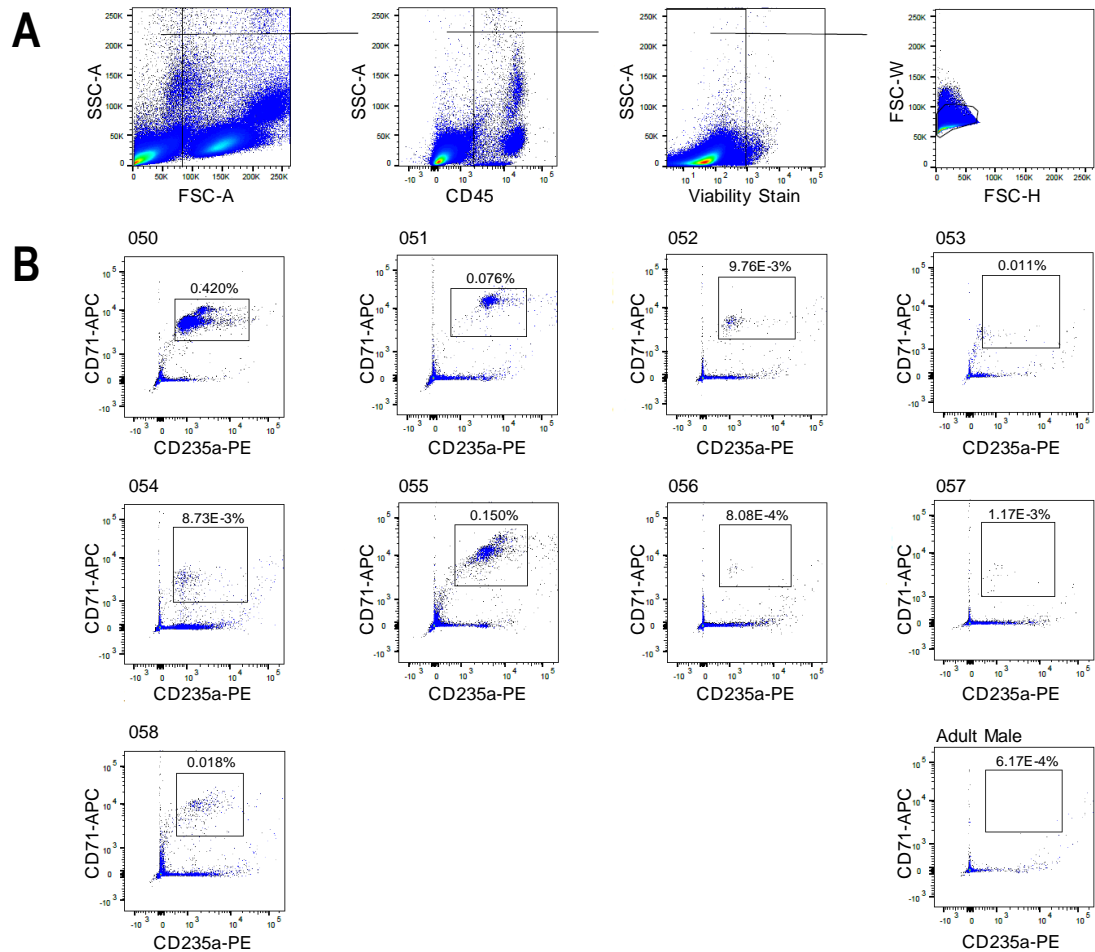

**Figure S1: Gating strategy to sort CD71 and CD235a positive cells and FACS density plots for nine cases and a control.**

**A.** Gating strategy to sort CD71 and CD235a double-positive cells..

**B.** FACS density plots of nucleated cells isolated from blood of nine pregnant women and of an adult male. CD71 and CD235a double-positive cells are boxed.
